# Supplementary material for: Baculovirus Vectors Induce the Production of Interferons in Swine: Their Potential in the Development of Antiviral Strategies
Source: MDPI journal article supplement (doi:10.3390/vetsci8110278), 2021-11-17
Supplement: s1 [file s1]

# Baculovirus Vectors Induce the Production of Interferons in Swine: Their Potential in the Development of Antiviral Strategies

Guido Nicolás Molina, Sabrina Amalfi, Ignacio Otero, Oscar Taboga, and María Paula Molinari

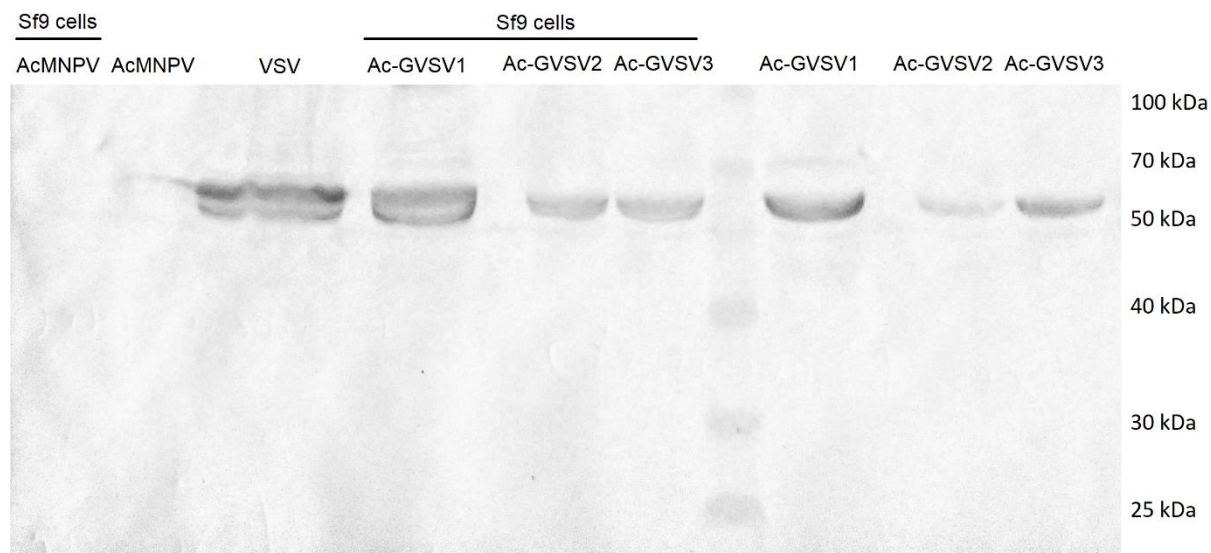

Original Western blot figures.
